# Supplementary material for: Nitrate Modulates Lateral Root Formation by Regulating the Auxin Response and Transport in Rice
Source: MDPI journal article supplement (doi:10.3390/genes12060850), 2021-06-01
Supplement: s1 [file s1]

**Supplementary Table S1** The primers for qRT-PCR of *ARF1* and *PIN2* genes

| Gene           | Primer sequence                                           |
|----------------|-----------------------------------------------------------|
| <i>OsARF1</i>  | 5'-ATCGCTATATGGAATCACTGA-3'<br>5'-GAGCCTCTTCACCTTCAA-3'   |
| <i>OsPIN2</i>  | 5'-CAACACCTACTCCAGCCTC-3'<br>5'-TGGACCAGTCAAGAACCTC-3'    |
| <i>OsActin</i> | 5'-CAACACCCCTGCTATGTACG-3'<br>5'-CATCACCAGAGTCCAACACAA-3' |

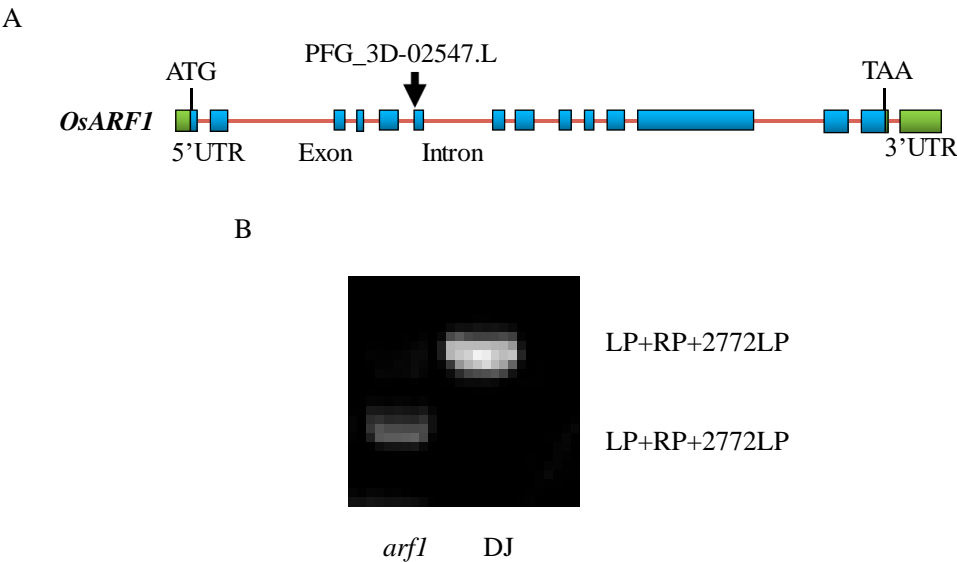

**Supplementary Figure S1** Identification of the T-DNA insertion *arf1* mutant. (A) Gene structure of *ARF1* and the T-DNA insertion site. The exons and introns are indicated by bold boxes and lines, respectively. Insertion site of T-DNA in the mutant line is indicated by arrowhead showing the name of mutant. (B) Identification of homozygous T-DNA insertion mutant by two rounds of PCR.

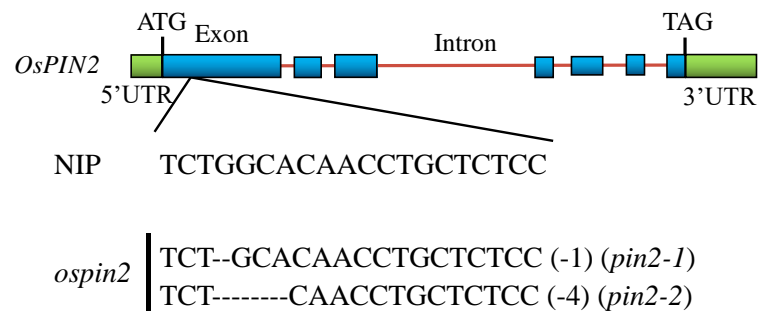

**Supplementary Figure S2** Sequencing verification of CRISPR-edited *PIN2* knockout mutants. Seedlings were grown in hydroponic medium containing normal nutrition.
